# Supplementary material for: Trends and influences on air and sea surface temperatures in Kuwait and the northern Arabian/Persian Gulf
Source: Research Square preprint supplement (doi:10.21203/rs.3.rs-6997818/v1), 2025-07-15
Supplement: Supplementary file 2 [file 2634e81117232e5070335017.docx]

| Month | Air temp (Kuwait Int. Airport) | | HadSST1.1 | |
| --- | --- | --- | --- | --- |
| 1962-1990 | 1991-2022 | 1930-2024 | 1991-2024 |
| January | -0.57 | 0.83 | 0.03 | 0.38 |
| February | -0.58 | 1.04 | 0 | 0.23 |
| March | -0.59 | 1.26 | 0.02 | 0.4 |
| April | 0.49 | 1.18 | 0.04 | 0.29 |
| May | 0.28 | 0.64 | 0.08 | 0.41 |
| June | 0.01 | 0.83 | 0.05 | 0.21 |
| July | 0.4 | 1.14 | 0.11 | 0.42 |
| August | -0.08 | 0.91 | 0.08 | 0.35 |
| September | 0.08 | 0.88 | 0.1 | 0.38 |
| October | -0.23 | 1.1 | 0.1 | 0.37 |
| November | -0.52 | 1.05 | 0.07 | 0.26 |
| December | -0.39 | 0.71 | 0.06 | 0.34 |
| Mean = | -0.14 | 0.96 | 0.06 | 0.34 |
| SD = | 0.38 | 0.18 | 0.03 | 0.07 |
