# Supplementary material for: Trends and influences on air and sea surface temperatures in Kuwait and the northern Arabian/Persian Gulf
Source: Research Square preprint supplement (doi:10.21203/rs.3.rs-6997818/v1), 2025-07-15
Supplement: Supplementary file 4 [file 90c86e424dab9870fd723920.docx]

**APPENDIX**

Estimations of the energy mass balances between Kuwait City and the Inner Arabian Gulf and the assumptions made. All calculations were made in ChatGPT.

**A1. An estimation of the heat contribution of 40oC (summer) air of Kuwait City to the sea surface temperature in the inner Gulf.**

- volume of seawater: Vs = 1.11×109 m3
- Volume of air: Va = 2×109 m3
- Initial air temperature: Ta = 40∘C
- Seawater density: ρs ≈ 1025 kg/m3
- Specific heat capacity of seawater: Cs ≈ 4186 J/kg°C (Mustafa *et al*., 2016)
- Specific heat capacity of air: Ca ≈ 1005 J/kg°C
- The density of air: ρa ≈ 1.225 kg/m3

Assume all the heat from the air is transferred to the seawater. The heat energy is given by Newton’s cooling formula:

Q = m⋅C⋅ΔT

Where ma is (ρa. Va) and ms = (ρs. Vs)

For the air, the heat energy transferred will be:

Qa = ma⋅Ca⋅ΔTa

Where ΔTa ​ is the temperature change of the air. This heat is then absorbed by the seawater, causing its temperature to rise.

Now, let's assume that the air cools down by ΔTa and that the temperature rise in seawater ΔTs is the same. This means:

Qs = Qa = ms⋅Cs⋅ΔTs

Setting the heat energy transferred equal for both, we have:

ma⋅Ca​⋅ΔTa​ = ms​⋅Cs⋅ΔTs

Now, solve for the temperature change of the seawater:

ΔTs = (ma⋅Ca⋅ΔTa)/(ms⋅Cs )

If we assume that the air has a small temperature change after interacting with the seawater, we can estimate that the temperature rise of seawater will be proportional to the amount of energy transferred from the air.

Let’s now approximate the increase for a temperature change, say ΔTa = 10∘C

ΔTs​= ((2.45×109kg)⋅(1005J/kg°C)⋅10∘C​ )/( (1.13775×1012 kg)⋅(4186J/kg°C))

ΔTs ≈ 0.00525∘C

A2. **An estimation of the time-scale for heat transfer**

As before, the heat transfer follows **Newton’s Law of Cooling/Heating**:

Rearranging and integrating:

where:

- Tw = 40∘ C (starting seawater temperature)
- Ti = 20∘C (initial air temperature)
- Tf = 39∘C (final air temperature, nearly equilibrium)
- CV=1.23×103 J/m³·K (volumetric heat capacity of air)
- V= 200×107 m³ (air volume)
- h=50 W/m²·K (convective heat transfer coefficient)
- A=108 m² (contact surface area)
